# Supplementary material for: Live Cell Poration by Au Nanostars to Probe Intracellular Molecular Composition with SERS
Source: MDPI journal article supplement (doi:10.3390/nano11102588), 2021-09-30
Supplement: s1 [file s1]

# Live Cell Poration by Au Nanostars to Probe Intracellular Molecular Composition with SERS

Evelina I. Nikelshparg, Ekaterina S. Prikhodzhenko, Roman A. Verkhovskii, Vsevolod S. Atkin, Vitaly A. Khanadeev, Boris N. Khlebtsov and Daniil N. Bratashov

- <sup>1</sup> Department of Biophysics, Biological Faculty, Moscow State University, 1–12 Leninskie Gory, 119991 Moscow, Russia
- <sup>2</sup> Science Medical Center, Saratov State University, Astrakhanskaya, 410012 Saratov, Russia; prikhodzhenko@sgu.ru (E.S.P.); r.a.verhovskiy@sgu.ru (R.A.V.); atkin.vsevolod@gmail.com (V.S.A.); khlebtsov\_b@ibppm.ru (B.N.K.)
- <sup>3</sup> Institute of Biochemistry and Physiology of Plants and Microorganisms, Russian Academy of Sciences, Prospekt Entuziastov, 410049 Saratov, Russia; khanadeev\_v@ibppm.ru
- <sup>4</sup> Veterinary Medicine and Biotechnology Faculty, Saratov State Agrarian University, 1 Teatralnaya Square, 410012 Saratov, Russia
- <sup>5</sup> Moscow Institute of Physics and Technology, 9 Institutskiy per., 141701 Dolgoprudny, Russia
- \* Correspondence: nikelshparg.evelina.2010@post.bio.msu.ru (E.I.N.); bratashovdn@info.sgu.ru (D.N.B.)

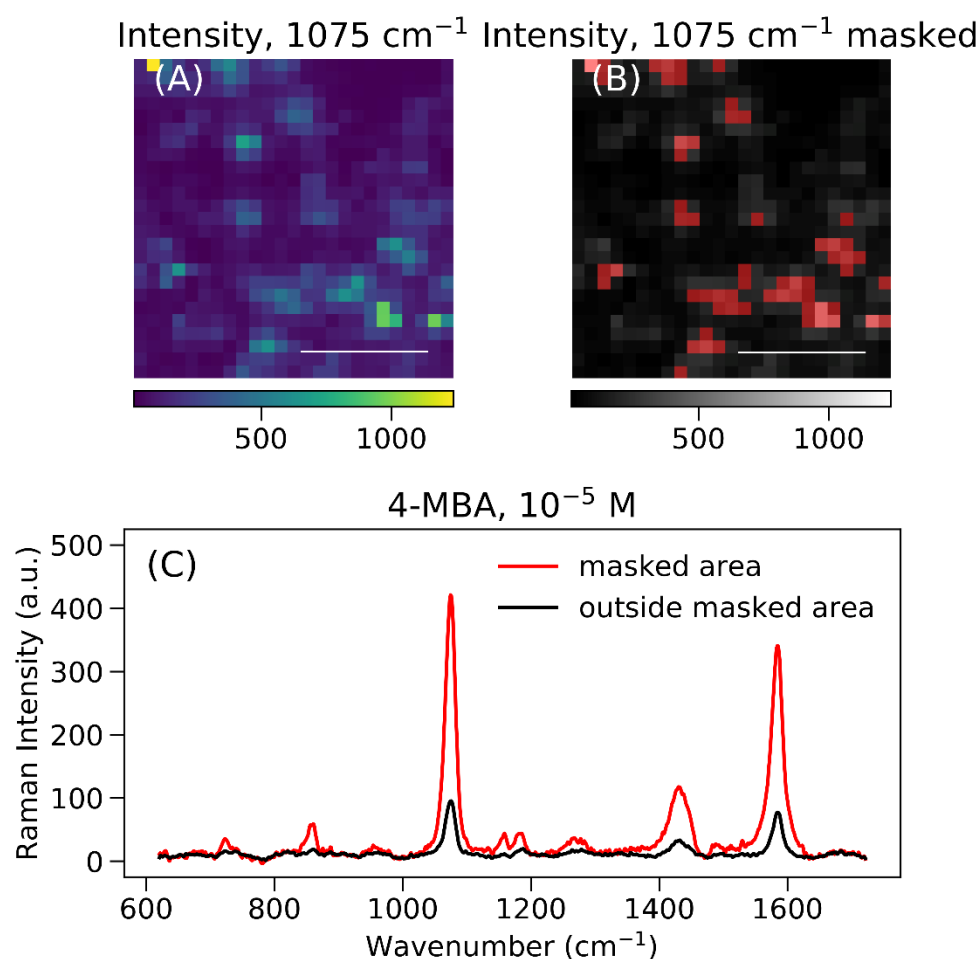

**Figure S1.** SERS map of 4-MBA ( $10^{-5}$  M solution in ethanol). (A) Intensity distribution at  $1075\text{ cm}^{-1}$  peak. (B) The same map, values above threshold calculated using Otsu's method are marked with red. The scale bars at (A,B) correspond to  $10\text{ }\mu\text{m}$ . (C) Mean spectra of area under (red line) and outside (black line) red mask (B).

**Table S1.** Raman peak assignment.

| Wavenumber/ $\text{cm}^{-1}$ | Assignment                                                 | Reference |
|------------------------------|------------------------------------------------------------|-----------|
| 583–589                      | $\text{PO}_4^{3-}$ in DNA and RNA                          | [1]       |
| 640–650                      | C–C twisting mode in proteins                              | [1–3]     |
| 645                          | [Fe–S]                                                     | [4]       |
| 660–670                      | Guanine, Thymine                                           | [5,6]     |
| 680                          | Guanine                                                    | [7]       |
| 702                          | Cholesterol, cholesterol ester                             | [7]       |
| 720                          | Adenine, phosphatidylcholine, sphingomyelin                | [8,9]     |
| 745                          | Thymine<br>H–C–O stretches in carbohydrates                | [5,10]    |
| 750–755                      | Heme C ( $\text{Fe}^{3+}$ )                                | [9]       |
| 760                          | Heme b ( $\text{Fe}^{3+}$ )                                | [9]       |
| 780                          | Uracil and Cytosine ring breathing                         | [9]       |
| 789                          | Cytosine                                                   | [9]       |
| 802                          | Uracil                                                     | [6,9]     |
| 810–820                      | Proteins, DNA, RNA                                         | [7]       |
| 832                          | RNA                                                        | [6]       |
| 900                          | Glycine                                                    | [3]       |
| 912                          | Carbohydrates                                              | [5]       |
| 1000                         | Phenylalanine                                              | [7]       |
| 1010                         | DPBS                                                       | [11]      |
| 1065–1067                    | Triacylglycerols, sphingomyelin;<br>DPBS                   | [8,9,11]  |
| 1080                         | Alkyl C–C stretches                                        | [10]      |
| 1112–1115                    | C–C trans stretches in saturated lipids, polysaccharides   | [10,12]   |
| 1120                         | Carbohydrates                                              | [10]      |
| 1125                         | Triacylglycerols                                           | [9]       |
| 1131                         | Triacylglycerols, sphingomyelin, phosphatidylcholine       | [8,9]     |
| 1140–1170                    | $\nu(\text{C–C})$ in lipids, proteins                      | [2,12]    |
| 1180                         | C–H bend in tyrosine, phenylalanine                        | [5]       |
| 1200                         | Proteins, DNA                                              | [7]       |
| 1206                         | Heme b; Adenine, Thymine                                   | [5,9]     |
| 1220–300                     | Amide III                                                  | [7,10]    |
| 1246                         | Amide III                                                  | [11]      |
| 1264                         | Adenine, Thymine                                           | [5]       |
| 1270                         | $=\text{C–H}$ cis stretch in unsaturated lipids, Amide III | [10]      |
| 1270                         | Unsaturated fatty acid                                     | [8]       |
| 1300–1330 (broad)            | Fatty acids                                                | [8,9]     |
| 1310                         | Adenine                                                    | [6,9]     |
| 1326                         | Guanine                                                    | [6,9]     |
| 1330                         | Carbohydrates                                              | [10]      |
| 1350                         | Proteins, lipids                                           | [9]       |
| 1360                         | Tryptophan                                                 | [1]       |
| 1370                         | Adenine, Thymine, Guanine                                  | [6]       |

|           |                                              |        |
|-----------|----------------------------------------------|--------|
| 1380–1390 | unassigned                                   |        |
| 1413      | C=C stretching                               | [7]    |
| 1432      | Adenine, Guanine                             | [6]    |
| 1445–1450 | Alkyl C–H <sub>2</sub> bend mostly in lipids | [8,9]  |
| 1480      | Adenine, Guanine                             | [6]    |
| 1490–1495 | C–N stretching vibration                     | [7]    |
| 1510      | Mostly cytosine                              | [5,9]  |
| 1535–50   | Adenine, Guanine                             | [6]    |
| 1545      | Heme B                                       | [9]    |
| 1548      | Heme C                                       | [9]    |
| 1560      | Tryptophan                                   | [3]    |
| 1570      | DNA, RNA, proteins                           | [5]    |
| 1595      | Adenine                                      | [6]    |
| 1600      | C–C stretch                                  | [5,12] |

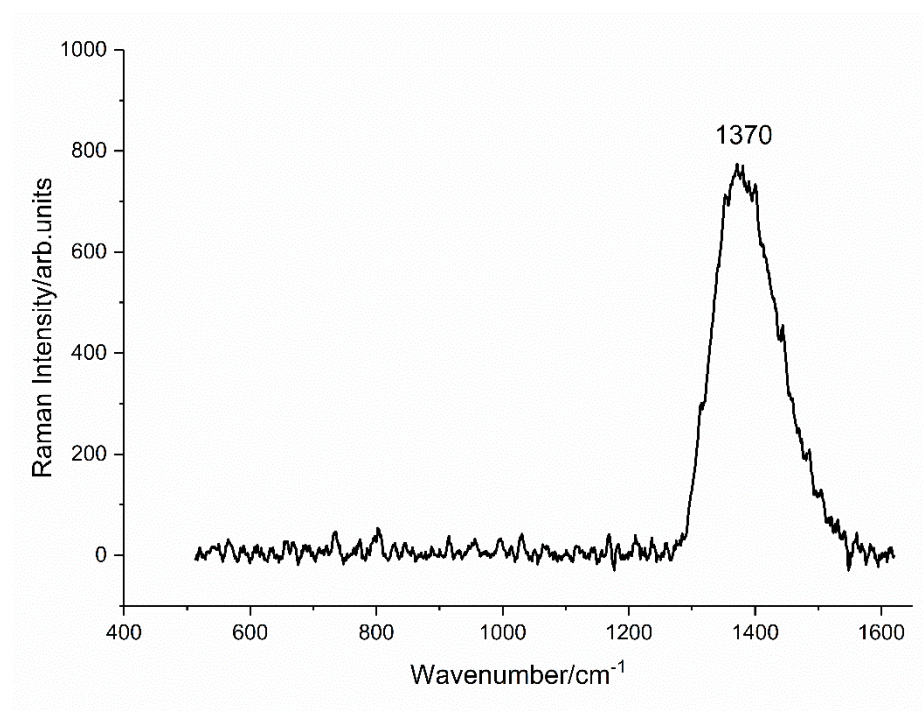

**Figure S2.** Spectrum of a cell outside gold substrates registered with 50×/0.5 n.a. objective lens, laser wavelength 785 nm, laser power 3 mW, acquisition time 1 s.

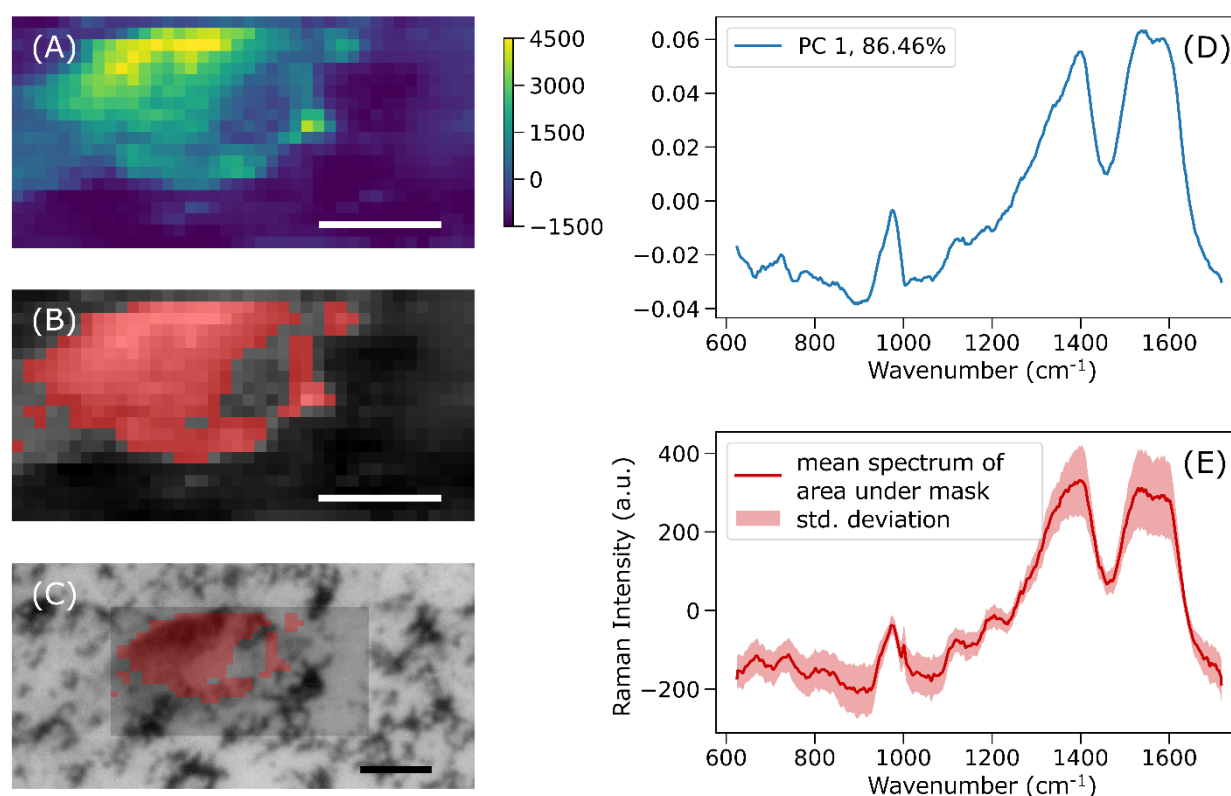

**Figure S3.** SERS mapping of B16-F10 cell. (A,B) 1st component in PCA decomposition (PC 1) score distribution. (C) White light image, scanning area is marked with light grey color. Red mask (B,C) corresponds to values (PC 1 score) above threshold calculated using Otsu's method. (D) PC 1 explaining 86.46% overall variance. (E) Mean spectrum of area under mask (B,C) with its standard deviation.

## References

- Cheng, W.-T.; Liu, M.-T.; Liu, H.-N.; Lin, S.-Y. Micro-Raman spectroscopy used to identify and grade human skin pilomatrixoma. *Microsc. Res. Tech.* **2005**, *68*, 75–79, doi:10.1002/jemt.20229.
- Panikkanvalappil, S.R.; Hira, S.M.; Mahmoud, M.A.; El-Sayed, M.A. Unraveling the Biomolecular Snapshots of Mitosis in Healthy and Cancer Cells Using Plasmonically-Enhanced Raman Spectroscopy. *J. Am. Chem. Soc.* **2014**, *136*, 15961–15968, doi:10.1021/ja506289u.
- Zhu, G.; Zhu, X.; Fan, Q.; Wan, X. Raman spectra of amino acids and their aqueous solutions. *Spectrochim. Acta Part A: Mol. Biomol. Spectrosc.* **2011**, *78*, 1187–1195, doi:10.1016/j.saa.2010.12.079.
- Erjavec, N.; Pinato, G.; Ramser, K. Raman spectroscopy as a tool for detecting mitochondrial fitness. *J. Raman Spectrosc.* **2016**, *47*, 933–939, doi:10.1002/jrs.4930.
- Chan, J.W.; Taylor, D.S.; Zwerdling, T.; Lane, S.M.; Ihara, K.; Huser, T. Micro-Raman Spectroscopy Detects Individual Neoplastic and Normal Hematopoietic Cells. *Biophys. J.* **2006**, *90*, 648–656, doi:10.1529/biophysj.105.066761.
- Huefner, A.; Kuan, W.-L.; Barker, R.A.; Mahajan, S. Intracellular SERS Nanoprobes For Distinction Of Different Neuronal Cell Types. *Nano Lett.* **2013**, *13*, 2463–2470, doi:10.1021/nl400448n.
- Movasaghi, Z.; Rehman, S.; Rehman, I.U. Raman Spectroscopy of Biological Tissues. *Appl. Spectrosc. Rev.* **2007**, *42*, 493–541, doi:10.1080/05704920701551530.
- Krafft, C.; Neudert, L.; Simat, T.; Salzer, R. Near infrared Raman spectra of human brain lipids. *Spectrochim. Acta Part A: Mol. Biomol. Spectrosc.* **2005**, *61*, 1529–1535, doi:10.1016/j.saa.2004.11.017.
- Brazhe, N.A.; Nikelshparg, E.I.; Prats, C.; Dela, F.; Sosnovtseva, O. Raman probing of lipids, proteins, and mitochondria in skeletal myocytes: a case study on obesity. *J. Raman Spectrosc.* **2017**, *48*, 1158–1165, doi:10.1002/jrs.5182.

10. Wu, H.; Volponi, J.V.; Oliver, A.E.; Parikh, A.; Simmons, B.; Singh, S. In vivo lipidomics using single-cell Raman spectroscopy. *Proc. Natl. Acad. Sci.* **2011**, *108*, 3809–3814, doi:10.1073/pnas.1009043108.
11. Fazio, B.; D'Andrea, C.; Foti, A.; Messina, E.; Irrera, A.; Donato, M.G.; Villari, V.; Micali, N.; Marago, O.M.; Gucciardi, P.G. SERS detection of Biomolecules at Physiological pH via aggregation of Gold Nanorods mediated by Optical Forces and Plasmonic Heating. *Sci. Rep.* **2016**, *6*, 26952, doi:10.1038/srep26952.
12. Sch Schulz, H.; Baranska, M. Identification and quantification of valuable plant substances by IR and Raman spectroscopy. *Vib. Spectrosc.* **2007**, *43*, 13–25, doi:10.1016/j.vibspec.2006.06.001.
